# Supplementary material for: The lipid peroxidation-derived DNA adduct γ-OHPdG as a diagnostic and prognostic biomarker in hepatocellular carcinoma
Source: publisher site journal article supplement (doi:10.18632/aging.204910), 2023-07-28
Supplement: Supplementary file [file aging-v15i14-204910-supplementary-material-SD2.pdf]

## SUPPLEMENTARY TABLES

Supplementary Table 1. Univariate and multivariate analysis of overall survival for hepatocellular carcinoma.

| Characteristics            | Total(N) | Univariate analysis   |                  | Multivariate analysis |                  |
|----------------------------|----------|-----------------------|------------------|-----------------------|------------------|
|                            |          | Hazard ratio (95% CI) | P value          | Hazard ratio (95% CI) | P value          |
| Age                        | 228      | 1.001 (0.984-1.018)   | 0.903            |                       |                  |
| Sex                        | 228      |                       |                  |                       |                  |
| Female                     | 34       | Reference             |                  |                       |                  |
| Male                       | 194      | 1.282 (0.808-2.035)   | 0.291            |                       |                  |
| HbsAg                      | 228      |                       |                  |                       |                  |
| Negative                   | 35       | Reference             |                  |                       |                  |
| Positive                   | 193      | 1.207 (0.775-1.880)   | 0.405            |                       |                  |
| HBV DNA load               | 228      |                       |                  |                       |                  |
| $\leq 5 \times 10^2$ IU/ml | 136      | Reference             |                  |                       |                  |
| $> 5 \times 10^2$ IU/ml    | 92       | 1.328 (0.967-1.823)   | 0.079            | 0.865 (0.603-1.240)   | 0.430            |
| AFP, ng/ml                 | 228      |                       |                  |                       |                  |
| $\leq 20$                  | 78       | Reference             |                  |                       |                  |
| 20-400                     | 78       | 1.217 (0.822-1.802)   | 0.327            | 0.907 (0.600-1.372)   | 0.644            |
| $> 400$                    | 72       | 1.741 (1.186-2.555)   | <b>0.005</b>     | 0.880 (0.564-1.373)   | 0.574            |
| ALT levels                 | 228      |                       |                  |                       |                  |
| Normal                     | 146      | Reference             |                  |                       |                  |
| High                       | 82       | 1.285 (0.931-1.772)   | 0.127            |                       |                  |
| AST levels                 | 228      |                       |                  |                       |                  |
| Normal                     | 41       | Reference             |                  |                       |                  |
| High                       | 187      | 1.581 (1.015-2.464)   | <b>0.043</b>     | 1.341 (0.844-2.130)   | 0.214            |
| TBIL levels                | 228      |                       |                  |                       |                  |
| Normal                     | 173      | Reference             |                  |                       |                  |
| High                       | 55       | 1.402 (0.986-1.995)   | 0.060            | 1.485 (1.005-2.194)   | <b>0.047</b>     |
| PT levels                  | 228      |                       |                  |                       |                  |
| Normal                     | 137      | Reference             |                  |                       |                  |
| High                       | 91       | 1.356 (0.985-1.866)   | 0.061            | 1.196 (0.832-1.718)   | 0.334            |
| Alcoholism                 | 228      |                       |                  |                       |                  |
| No                         | 170      | Reference             |                  |                       |                  |
| Yes                        | 58       | 1.046 (0.732-1.494)   | 0.805            |                       |                  |
| Long-term smoking          | 228      |                       |                  |                       |                  |
| No                         | 148      | Reference             |                  |                       |                  |
| Yes                        | 80       | 1.243 (0.898-1.719)   | 0.190            |                       |                  |
| HCC family history         | 228      |                       |                  |                       |                  |
| No                         | 169      | Reference             |                  |                       |                  |
| Yes                        | 59       | 1.030 (0.719-1.476)   | 0.870            |                       |                  |
| Liver transplantation      | 228      |                       |                  |                       |                  |
| No                         | 207      | Reference             |                  |                       |                  |
| Yes                        | 21       | 1.463 (0.883-2.422)   | 0.140            |                       |                  |
| Tumor number               | 228      |                       |                  |                       |                  |
| 1 nodule                   | 187      | Reference             |                  |                       |                  |
| $\geq 2$ nodules           | 41       | 1.665 (1.137-2.437)   | <b>0.009</b>     | 2.045 (1.363-3.069)   | <b>&lt;0.001</b> |
| Tumor diameter             | 228      |                       |                  |                       |                  |
| $< 5$ cm                   | 116      | Reference             |                  |                       |                  |
| $\geq 5$ cm                | 112      | 2.854 (2.059-3.954)   | <b>&lt;0.001</b> | 2.104 (1.415-3.127)   | <b>&lt;0.001</b> |

|                           |     |                       |                  |                     |                  |
|---------------------------|-----|-----------------------|------------------|---------------------|------------------|
| Tumor capsule             | 228 |                       |                  |                     |                  |
| Present                   | 193 | Reference             |                  |                     |                  |
| Absent                    | 35  | 1.558 (1.051-2.310)   | <b>0.027</b>     | 1.490 (0.964-2.303) | 0.073            |
| Surgical margin           | 228 |                       |                  |                     |                  |
| Negative                  | 188 | Reference             |                  |                     |                  |
| Positive                  | 40  | 1.187 (0.787-1.790)   | 0.413            |                     |                  |
| Neoplastic necrosis       | 228 |                       |                  |                     |                  |
| No                        | 164 | Reference             |                  |                     |                  |
| Yes                       | 64  | 1.825 (1.307-2.549)   | <b>&lt;0.001</b> | 1.124 (0.763-1.658) | 0.554            |
| E-S grade                 | 228 |                       |                  |                     |                  |
| I-II                      | 121 | Reference             |                  |                     |                  |
| III-IV                    | 107 | 2.778 (2.013-3.835)   | <b>&lt;0.001</b> | 1.239 (0.774-1.982) | 0.372            |
| MVI grade                 | 228 |                       |                  |                     |                  |
| M0                        | 131 | Reference             |                  |                     |                  |
| M1                        | 47  | 2.830 (1.903-4.208)   | <b>&lt;0.001</b> | 2.023 (1.281-3.194) | <b>0.003</b>     |
| M2                        | 50  | 4.152 (2.837-6.076)   | <b>&lt;0.001</b> | 2.070 (1.189-3.602) | <b>0.010</b>     |
| Macrovascular invasion    | 228 |                       |                  |                     |                  |
| Negative                  | 205 | Reference             |                  |                     |                  |
| Positive                  | 23  | 2.719 (1.721-4.296)   | <b>&lt;0.001</b> | 0.842 (0.462-1.535) | 0.575            |
| Satellite nodules         | 228 |                       |                  |                     |                  |
| Absent                    | 210 | Reference             |                  |                     |                  |
| Present                   | 18  | 2.831 (1.680-4.770)   | <b>&lt;0.001</b> | 1.566 (0.876-2.800) | 0.130            |
| Liver Cirrhosis           | 228 |                       |                  |                     |                  |
| No                        | 30  | Reference             |                  |                     |                  |
| Yes                       | 198 | 0.943 (0.600-1.480)   | 0.798            |                     |                  |
| Ki67                      | 228 | 11.245 (4.329-29.208) | <b>&lt;0.001</b> | 1.666 (0.495-5.607) | 0.409            |
| $\gamma$ -OHPdG IHC Score | 228 | 1.011 (1.008-1.014)   | <b>&lt;0.001</b> | 1.011 (1.008-1.014) | <b>&lt;0.001</b> |

Statistically significant p values are in bold (p < 0.05).

Note: Long-term smoking was defined as smoking at least 10 cigarettes a day for more than 10 years.

**Supplementary Table 2. Univariate and multivariate analysis of intrahepatic recurrence-free survival for hepatocellular carcinoma.**

| Characteristics            | Total(N) | Univariate analysis   |              | Multivariate analysis |         |
|----------------------------|----------|-----------------------|--------------|-----------------------|---------|
|                            |          | Hazard ratio (95% CI) | P value      | Hazard ratio (95% CI) | P value |
| Age                        | 228      | 1.006 (0.987-1.024)   | 0.552        |                       |         |
| Sex                        | 228      |                       |              |                       |         |
| Female                     | 34       | Reference             |              |                       |         |
| Male                       | 194      | 0.972 (0.621-1.521)   | 0.900        |                       |         |
| HbsAg                      | 228      |                       |              |                       |         |
| Negative                   | 35       | Reference             |              |                       |         |
| Positive                   | 193      | 1.167 (0.746-1.825)   | 0.500        |                       |         |
| HBV DNA load               | 228      |                       |              |                       |         |
| $\leq 5 \times 10^2$ IU/ml | 136      | Reference             |              |                       |         |
| $> 5 \times 10^2$ IU/ml    | 92       | 1.440 (1.032-2.009)   | <b>0.032</b> | 1.137 (0.787-1.644)   | 0.494   |
| AFP, ng/ml                 | 228      |                       |              |                       |         |
| $\leq 20$                  | 78       | Reference             |              |                       |         |
| 20-400                     | 78       | 1.493 (0.993-2.244)   | 0.054        | 1.260 (0.826-1.924)   | 0.283   |
| $> 400$                    | 72       | 1.916 (1.264-2.907)   | <b>0.002</b> | 1.239 (0.778-1.974)   | 0.367   |
| ALT levels                 | 228      |                       |              |                       |         |
| Normal                     | 146      | Reference             |              |                       |         |
| High                       | 82       | 1.152 (0.814-1.631)   | 0.425        |                       |         |
| AST levels                 | 228      |                       |              |                       |         |
| Normal                     | 41       | Reference             |              |                       |         |
| High                       | 187      | 1.280 (0.835-1.962)   | 0.257        |                       |         |
| TBIL levels                | 228      |                       |              |                       |         |
| Normal                     | 173      | Reference             |              |                       |         |
| High                       | 55       | 1.229 (0.841-1.796)   | 0.287        |                       |         |
| PT levels                  | 228      |                       |              |                       |         |
| Normal                     | 137      | Reference             |              |                       |         |
| High                       | 91       | 1.059 (0.755-1.486)   | 0.738        |                       |         |
| Alcoholism                 | 228      |                       |              |                       |         |
| No                         | 170      | Reference             |              |                       |         |
| Yes                        | 58       | 1.052 (0.725-1.526)   | 0.790        |                       |         |
| Long-term smoking          | 228      |                       |              |                       |         |
| No                         | 148      | Reference             |              |                       |         |
| Yes                        | 80       | 1.174 (0.833-1.656)   | 0.360        |                       |         |
| HCC family history         | 228      |                       |              |                       |         |
| No                         | 169      | Reference             |              |                       |         |
| Yes                        | 59       | 0.981 (0.667-1.443)   | 0.922        |                       |         |
| Liver transplantation      | 228      |                       |              |                       |         |
| No                         | 207      | Reference             |              |                       |         |
| Yes                        | 21       | 0.731 (0.384-1.391)   | 0.339        |                       |         |
| Tumor number               | 228      |                       |              |                       |         |
| 1 nodule                   | 187      | Reference             |              |                       |         |
| $\geq 2$ nodules           | 41       | 1.312 (0.862-1.996)   | 0.205        |                       |         |
| Tumor diameter             | 228      |                       |              |                       |         |
| $< 5$ cm                   | 116      | Reference             |              |                       |         |
| $\geq 5$ cm                | 112      | 1.706 (1.222-2.382)   | <b>0.002</b> | 1.197 (0.806-1.777)   | 0.374   |
| Tumor capsule              | 228      |                       |              |                       |         |
| Present                    | 193      | Reference             |              |                       |         |

|                           |     |                     |                  |                     |                  |
|---------------------------|-----|---------------------|------------------|---------------------|------------------|
| Absent                    | 35  | 1.491 (0.959-2.318) | 0.076            | 1.345 (0.849-2.130) | 0.207            |
| Surgical margin           | 228 |                     |                  |                     |                  |
| Negative                  | 188 | Reference           |                  |                     |                  |
| Positive                  | 40  | 1.264 (0.825-1.937) | 0.283            |                     |                  |
| Neoplastic necrosis       | 228 |                     |                  |                     |                  |
| No                        | 164 | Reference           |                  |                     |                  |
| Yes                       | 64  | 1.297 (0.896-1.878) | 0.168            |                     |                  |
| E-S grade                 | 228 |                     |                  |                     |                  |
| I-II                      | 121 | Reference           |                  |                     |                  |
| III-IV                    | 107 | 1.695 (1.213-2.368) | <b>0.002</b>     | 1.083 (0.726-1.616) | 0.696            |
| MVI grade                 | 228 |                     |                  |                     |                  |
| M0                        | 131 | Reference           |                  |                     |                  |
| M1                        | 47  | 1.774 (1.158-2.720) | <b>0.008</b>     | 1.406 (0.881-2.246) | 0.153            |
| M2                        | 50  | 2.355 (1.547-3.585) | <b>&lt;0.001</b> | 1.388 (0.791-2.435) | 0.254            |
| Macrovascular invasion    | 228 |                     |                  |                     |                  |
| Negative                  | 205 | Reference           |                  |                     |                  |
| Positive                  | 23  | 2.508 (1.441-4.366) | <b>0.001</b>     | 1.386 (0.705-2.725) | 0.344            |
| Satellite nodules         | 228 |                     |                  |                     |                  |
| Absent                    | 210 | Reference           |                  |                     |                  |
| Present                   | 18  | 2.418 (1.291-4.529) | <b>0.006</b>     | 1.652 (0.861-3.170) | 0.131            |
| Liver Cirrhosis           | 228 |                     |                  |                     |                  |
| No                        | 30  | Reference           |                  |                     |                  |
| Yes                       | 198 | 1.094 (0.675-1.775) | 0.715            |                     |                  |
| Ki67                      | 228 | 1.817 (0.606-5.445) | 0.287            |                     |                  |
| $\gamma$ -OHPdG IHC Score | 228 | 1.008 (1.005-1.011) | <b>&lt;0.001</b> | 1.007 (1.004-1.009) | <b>&lt;0.001</b> |

Statistically significant p values are in bold ( $p < 0.05$ ).

Note: Long-term smoking was defined as smoking at least 10 cigarettes a day for more than 10 years.

**Supplementary Table 3. Univariate and multivariate analysis of distant metastasis-free survival for hepatocellular carcinoma.**

| Characteristics            | Total(N) | Univariate analysis   |                  | Multivariate analysis |              |
|----------------------------|----------|-----------------------|------------------|-----------------------|--------------|
|                            |          | Hazard ratio (95% CI) | P value          | Hazard ratio (95% CI) | P value      |
| Age                        | 228      | 0.988 (0.957-1.019)   | 0.438            |                       |              |
| Sex                        | 228      |                       |                  |                       |              |
| Female                     | 34       | Reference             |                  |                       |              |
| Male                       | 194      | 2.002 (0.712-5.626)   | 0.188            |                       |              |
| HbsAg                      | 228      |                       |                  |                       |              |
| Negative                   | 35       | Reference             |                  |                       |              |
| Positive                   | 193      | 1.541 (0.607-3.912)   | 0.363            |                       |              |
| HBV DNA load               | 228      |                       |                  |                       |              |
| $\leq 5 \times 10^2$ IU/ml | 136      | Reference             |                  |                       |              |
| $> 5 \times 10^2$ IU/ml    | 92       | 1.260 (0.692-2.294)   | 0.449            |                       |              |
| AFP, ng/ml                 | 228      |                       |                  |                       |              |
| $\leq 20$                  | 78       | Reference             |                  |                       |              |
| 20-400                     | 78       | 0.641 (0.302-1.359)   | 0.246            |                       |              |
| $> 400$                    | 72       | 1.075 (0.540-2.140)   | 0.836            |                       |              |
| ALT levels                 | 228      |                       |                  |                       |              |
| Normal                     | 146      | Reference             |                  |                       |              |
| High                       | 82       | 1.804 (0.998-3.264)   | 0.051            | 1.146 (0.573-2.292)   | 0.700        |
| AST levels                 | 228      |                       |                  |                       |              |
| Normal                     | 41       | Reference             |                  |                       |              |
| High                       | 187      | 5.357 (1.295-22.163)  | <b>0.021</b>     | 5.993 (1.352-26.561)  | <b>0.018</b> |
| TBIL levels                | 228      |                       |                  |                       |              |
| Normal                     | 173      | Reference             |                  |                       |              |
| High                       | 55       | 0.920 (0.441-1.921)   | 0.825            |                       |              |
| PT levels                  | 228      |                       |                  |                       |              |
| Normal                     | 137      | Reference             |                  |                       |              |
| High                       | 91       | 1.430 (0.790-2.592)   | 0.238            |                       |              |
| Alcoholism                 | 228      |                       |                  |                       |              |
| No                         | 170      | Reference             |                  |                       |              |
| Yes                        | 58       | 0.960 (0.485-1.900)   | 0.906            |                       |              |
| Long-term smoking          | 228      |                       |                  |                       |              |
| No                         | 148      | Reference             |                  |                       |              |
| Yes                        | 80       | 1.062 (0.569-1.983)   | 0.849            |                       |              |
| HCC family history         | 228      |                       |                  |                       |              |
| No                         | 169      | Reference             |                  |                       |              |
| Yes                        | 59       | 1.237 (0.647-2.365)   | 0.521            |                       |              |
| Liver transplantation      | 228      |                       |                  |                       |              |
| No                         | 207      | Reference             |                  |                       |              |
| Yes                        | 21       | 2.060 (0.917-4.627)   | 0.080            | 2.337 (1.004-5.443)   | <b>0.049</b> |
| Tumor number               | 228      |                       |                  |                       |              |
| 1 nodule                   | 187      | Reference             |                  |                       |              |
| $\geq 2$ nodules           | 41       | 0.803 (0.339-1.903)   | 0.619            |                       |              |
| Tumor diameter             | 228      |                       |                  |                       |              |
| $< 5$ cm                   | 116      | Reference             |                  |                       |              |
| $\geq 5$ cm                | 112      | 3.425 (1.783-6.581)   | <b>&lt;0.001</b> | 2.645 (1.284-5.446)   | <b>0.008</b> |
| Tumor capsule              | 228      |                       |                  |                       |              |
| Present                    | 193      | Reference             |                  |                       |              |
| Absent                     | 35       | 1.769 (0.873-3.585)   | 0.114            |                       |              |

|                           |     |                       |                  |                        |              |
|---------------------------|-----|-----------------------|------------------|------------------------|--------------|
| Surgical margin           | 228 |                       |                  |                        |              |
| Negative                  | 188 | Reference             |                  |                        |              |
| Positive                  | 40  | 1.152 (0.534-2.484)   | 0.719            |                        |              |
| Neoplastic necrosis       | 228 |                       |                  |                        |              |
| No                        | 164 | Reference             |                  |                        |              |
| Yes                       | 64  | 1.496 (0.792-2.828)   | 0.215            |                        |              |
| E-S grade                 | 228 |                       |                  |                        |              |
| I-II                      | 121 | Reference             |                  |                        |              |
| III-IV                    | 107 | 2.124 (1.159-3.895)   | <b>0.015</b>     | 0.702 (0.323-1.524)    | 0.371        |
| MVI grade                 | 228 |                       |                  |                        |              |
| M0                        | 131 | Reference             |                  |                        |              |
| M1                        | 47  | 3.799 (1.905-7.577)   | <b>&lt;0.001</b> | 2.763 (1.281-5.963)    | <b>0.010</b> |
| M2                        | 50  | 2.599 (1.174-5.750)   | <b>0.018</b>     | 0.581 (0.202-1.672)    | 0.314        |
| Macrovascular invasion    | 228 |                       |                  |                        |              |
| Negative                  | 205 | Reference             |                  |                        |              |
| Positive                  | 23  | 2.483 (1.100-5.606)   | <b>0.029</b>     | 2.798 (1.008-7.766)    | <b>0.048</b> |
| Satellite nodules         | 228 |                       |                  |                        |              |
| Absent                    | 210 | Reference             |                  |                        |              |
| Present                   | 18  | 2.470 (0.967-6.308)   | 0.059            | 1.294 (0.455-3.682)    | 0.629        |
| Liver Cirrhosis           | 228 |                       |                  |                        |              |
| No                        | 30  | Reference             |                  |                        |              |
| Yes                       | 198 | 0.796 (0.354-1.789)   | 0.581            |                        |              |
| Ki67                      | 228 | 14.283 (2.497-81.698) | <b>0.003</b>     | 20.337 (1.590-260.160) | <b>0.021</b> |
| $\gamma$ -OHPdG IHC Score | 228 | 1.009 (1.004-1.014)   | <b>&lt;0.001</b> | 1.008 (1.003-1.014)    | <b>0.002</b> |

Statistically significant p values are in bold (p < 0.05).

Note: Long-term smoking was defined as smoking at least 10 cigarettes a day for more than 10 years.
